# Supplementary figures and images for: SerpinA1 levels in amyotrophic lateral sclerosis patients: An exploratory study
Source: PubMed Central journal article supplement — Eur J Neurol. 2023 Sep 7;31(1):e16054. doi: 10.1111/ene.16054 (PMC11235621; doi:10.1111/ene.16054), 2023-09-07

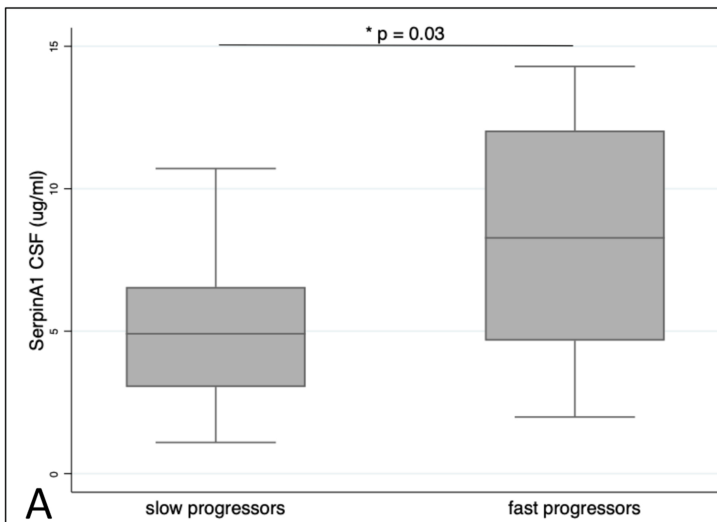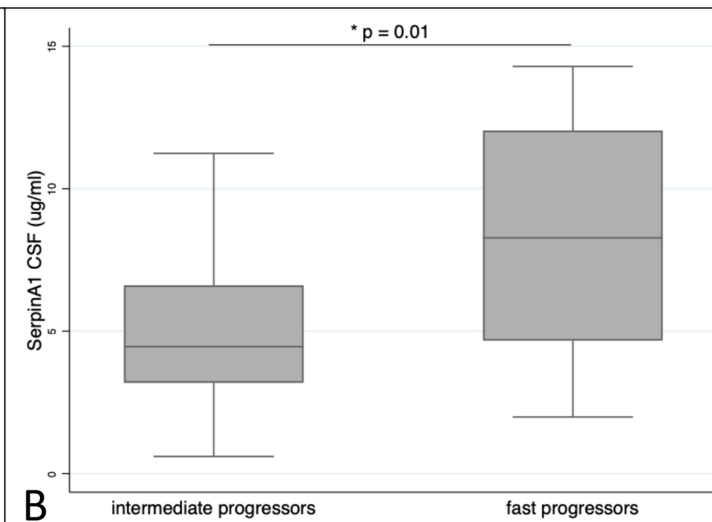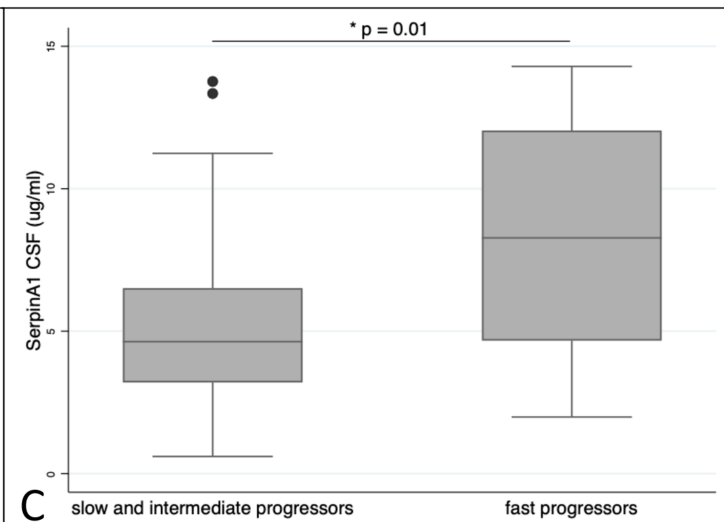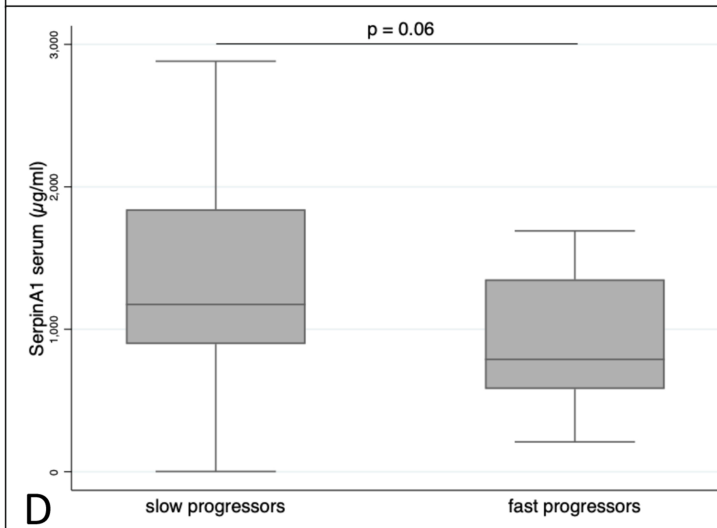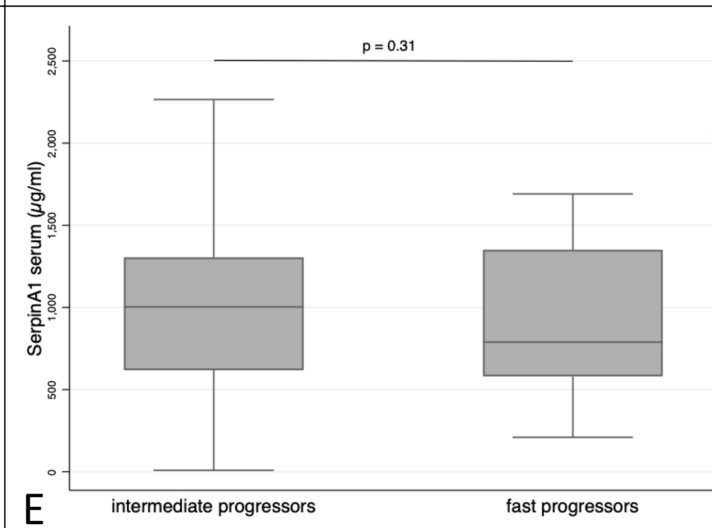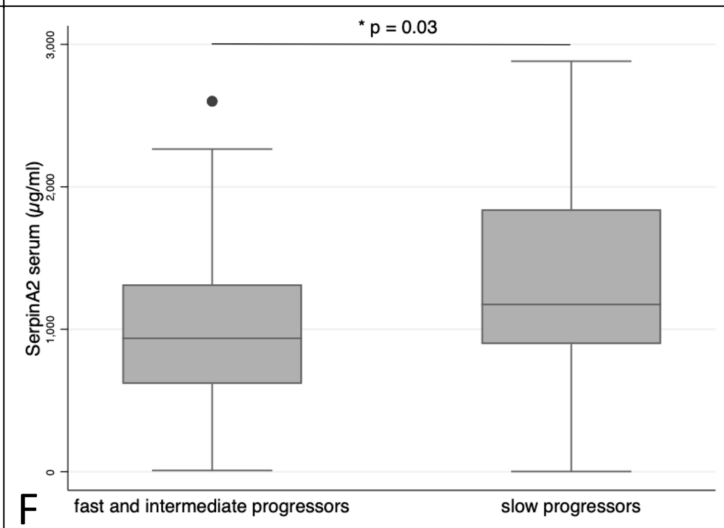

Supplement: ENE-31-e16054-s002.pdf [file ENE-31-e16054-s002.pdf]
